# Supplementary material for: Genome-Wide DNA Polymorphisms in Seven Rice Cultivars of Temperate and Tropical Japonica Groups
Source: PubMed Central journal article supplement (PMC3897683; doi:10.1371/journal.pone.0086312), 2014-01-21
Supplement: pone.0086312.s010.pdf [file pone.0086312.s010.pdf]

# Chr. 9

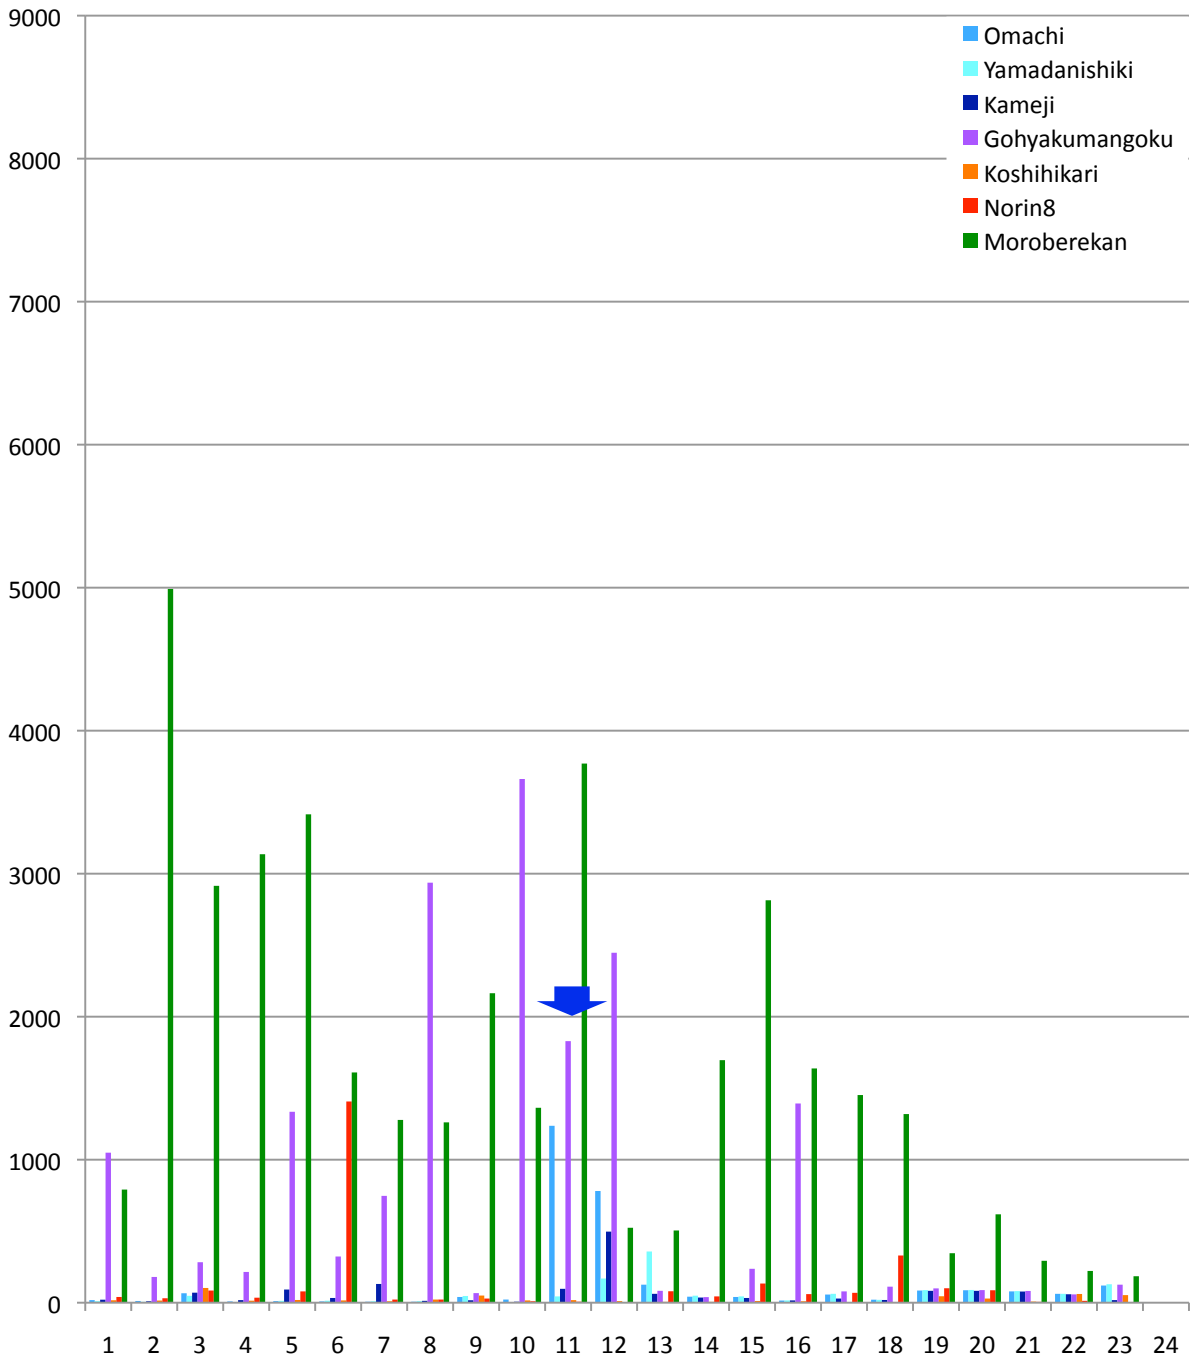

**Figure S10. Distribution of SNPs between the different cultivars and Nipponbare reference sequence across the chromosome 9.** The x-axis represents the physical distance along each chromosome, split into 1 Mb windows. The y-axis indicates the number of SNPs. The blue arrows show the remarkably different regions between Omachi and Yamadanishiki.
