# Supplementary material for: Genome-Wide DNA Polymorphisms in Seven Rice Cultivars of Temperate and Tropical Japonica Groups
Source: PubMed Central journal article supplement (PMC3897683; doi:10.1371/journal.pone.0086312), 2014-01-21
Supplement: pone.0086312.s014.pdf [file pone.0086312.s014.pdf]

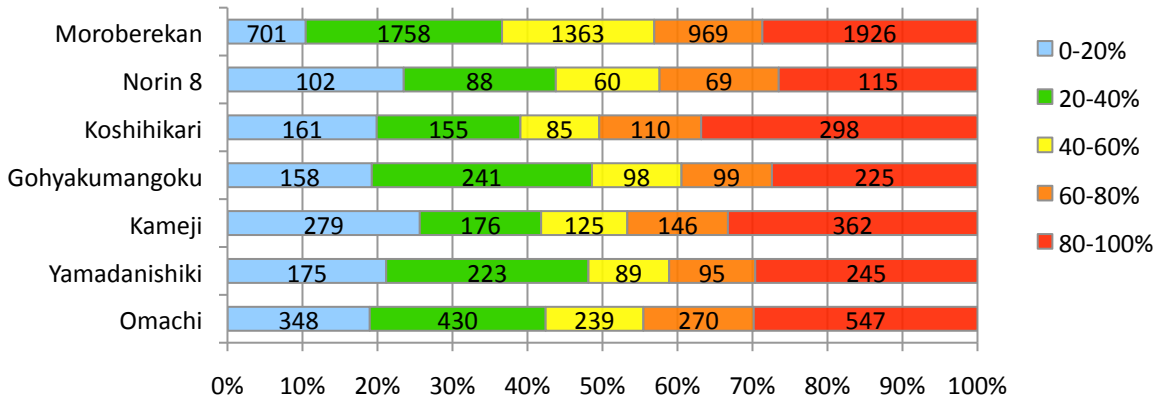

**Figure S14. The degree of unique hit sequences in the contig sequences.** The results are shown by colour boxes classified to 5 groups on the basis of percentages of the alignment length in the contig length: 0–20% (blue), 20–40% (green), 40–60% (yellow), 60–80% (orange), and 80–100% (red). The numbers in the bars show the number of contigs.
