# Supplementary material for: Genome-Wide DNA Polymorphisms in Seven Rice Cultivars of Temperate and Tropical Japonica Groups
Source: PubMed Central journal article supplement (PMC3897683; doi:10.1371/journal.pone.0086312), 2014-01-21
Supplement: pone.0086312.s015.pdf [file pone.0086312.s015.pdf]

**Table S1. Classification of short-reads mapped onto mitochondrial, plastid, and chromosomal genome IRGSP1.0, as well as unmapped reads.**

|                | Mapped Reads  |              |           |              |            |              |           |              |             |              |            |              | unmapped reads |     |
|----------------|---------------|--------------|-----------|--------------|------------|--------------|-----------|--------------|-------------|--------------|------------|--------------|----------------|-----|
|                | Mitochondrion |              |           |              | Plastid    |              |           |              | Chromosome  |              |            |              | No. of reads   | %   |
|                | Unique        |              | Multi     |              | Unique     |              | Multi     |              | Unique      |              | Multi      |              |                |     |
| No. of reads   | %             | No. of reads | %         | No. of reads | %          | No. of reads | %         | No. of reads | %           | No. of reads | %          | No. of reads | %              |     |
| Omachi         | 2,465,440     | 0.8          | 1,908,084 | 0.6          | 6,546,757  | 2.2          | 3,845,886 | 1.3          | 230,205,002 | 77.5         | 39,627,132 | 13.3         | 12,613,864     | 4.2 |
| Yamadanishiki  | 1,129,087     | 0.6          | 773,402   | 0.4          | 1,921,946  | 1.1          | 1,140,563 | 0.6          | 148,367,298 | 82.1         | 21,585,116 | 11.9         | 5,754,116      | 3.2 |
| Kameji         | 2,929,666     | 1.3          | 2,333,624 | 1.0          | 12,811,248 | 5.8          | 5,132,130 | 2.3          | 167,729,858 | 75.3         | 24,176,161 | 10.9         | 7,502,681      | 3.4 |
| Gohyakumangoku | 934,816       | 0.4          | 696,109   | 0.3          | 2,494,812  | 1.0          | 1,242,848 | 0.5          | 198,189,791 | 83.1         | 26,123,664 | 10.9         | 8,921,475      | 3.7 |
| Koshihikari    | 3,691,560     | 1.7          | 2,935,079 | 1.4          | 15,369,048 | 7.1          | 6,894,827 | 3.2          | 158,014,758 | 72.8         | 21,489,667 | 9.9          | 8,769,487      | 4.0 |
| Norin 8        | 3,010,865     | 1.0          | 2,313,309 | 0.8          | 10,868,882 | 3.6          | 4,752,677 | 1.6          | 239,862,602 | 79.1         | 34,662,053 | 11.4         | 7,790,795      | 2.6 |
| Moroberekan    | 2,759,796     | 1.6          | 2,348,358 | 1.4          | 8,790,353  | 5.2          | 5,631,926 | 3.3          | 118,052,502 | 69.7         | 20,053,332 | 11.8         | 11,777,888     | 7.0 |
