# Supplementary material for: Genome-Wide DNA Polymorphisms in Seven Rice Cultivars of Temperate and Tropical Japonica Groups
Source: PubMed Central journal article supplement (PMC3897683; doi:10.1371/journal.pone.0086312), 2014-01-21
Supplement: pone.0086312.s016.pdf [file pone.0086312.s016.pdf]

**Table S2. Validation of genome-wide SNPs by array.**

| Cultivar       | Matched | Mismatched | Total |
|----------------|---------|------------|-------|
| Omachi         | 535     | 0          | 535   |
| Yamadanishiki  | 384     | 0          | 384   |
| Kameji         | 296     | 0          | 296   |
| Gohyakumangoku | 316     | 0          | 316   |
| Koshihikari    | 184     | 0          | 184   |
| Norin8         | 152     | 1          | 153   |
| Moroberekan    | 220     | 1          | 221   |

Genomic DNAs of each cultivar and Nipponbare were analysed using SNP arrays by using the Illumina Bead Station 500G system. Omachi, Yamadanishiki, Kameji, Gohyakumangoku, Koshihikari, and Norin 8 were analyzed using a set of SNPs that was selected from SNP resources developed on the basis of Omachi and Nippobare. Moroberekan was analyzed using a set of SNPs that was selected from SNP resources developed on the basis of *japonica* rice cultivars.
