# Supplementary material for: Genome-Wide DNA Polymorphisms in Seven Rice Cultivars of Temperate and Tropical Japonica Groups
Source: PubMed Central journal article supplement (PMC3897683; doi:10.1371/journal.pone.0086312), 2014-01-21
Supplement: pone.0086312.s017.pdf [file pone.0086312.s017.pdf]

**Table S3. Evaluation of assembly quality.**

| Cultivar       | Contig length (base) | Total number of sequences | Filtrated unmapped reads | Velvet hash value | Total number of used sequences | Total number of contigs | n50   | length of longest contig | Total bases in contigs | Number of contigs > 1k | Total bases in contigs > 1k |
|----------------|----------------------|---------------------------|--------------------------|-------------------|--------------------------------|-------------------------|-------|--------------------------|------------------------|------------------------|-----------------------------|
| Omachi         | 40                   | 8,559,356                 | 747,316                  | 23                | 522,902                        | 6,054                   | 622   | 4,213                    | 2,069,762              | 391                    | 576,524                     |
| Omachi         | 50                   | 8,559,356                 | 544,564                  | 27                | 427,684                        | 6,903                   | 621   | 4,498                    | 2,479,877              | 466                    | 670,098                     |
| Omachi         | 60                   | 8,559,356                 | 377,384                  | 31                | 297,983                        | 5,928                   | 592   | 4,427                    | 2,199,039              | 367                    | 522,954                     |
| Omachi         | 74                   | 8,559,356                 | 176,936                  | 37                | 133,061                        | 4,162                   | 526   | 4,223                    | 1,531,336              | 216                    | 307,434                     |
| Yamadanishiki  | 50                   | 4,348,564                 | 1,826,614                | 29                | 1,566,807                      | 4,020                   | 2,647 | 19,556                   | 3,587,102              | 933                    | 2,758,616                   |
| Kameji         | 50                   | 5,289,498                 | 2,559,720                | 31                | 2,232,138                      | 5,415                   | 2,283 | 28,450                   | 4,286,839              | 1,162                  | 3,173,808                   |
| Gohyakumangoku | 50                   | 7,067,046                 | 2,287,502                | 31                | 2,002,998                      | 4,555                   | 2,861 | 20,605                   | 4,189,891              | 1,048                  | 3,269,311                   |
| Koshihikari    | 50                   | 7,118,212                 | 4,808,504                | 29                | 2,108,905                      | 3,773                   | 3,238 | 24,023                   | 3,520,181              | 861                    | 2,822,335                   |
| Norin 8        | 50                   | 5,202,190                 | 2,344,516                | 31                | 2,131,843                      | 2,554                   | 3,178 | 20,130                   | 2,909,386              | 752                    | 2,393,298                   |
| Moroberekan    | 50                   | 8,981,714                 | 4,613,662                | 31                | 3,775,044                      | 23,706                  | 822   | 9,612                    | 10,896,353             | 2,613                  | 4,602,860                   |

Assembly results from the unmapped reads trimmed to various lengths are shown. Those reads were assembled into contigs by using VelvetOptimizer.
