# Supplementary material for: Genome-Wide DNA Polymorphisms in Seven Rice Cultivars of Temperate and Tropical Japonica Groups
Source: PubMed Central journal article supplement (PMC3897683; doi:10.1371/journal.pone.0086312), 2014-01-21
Supplement: pone.0086312.s018.pdf [file pone.0086312.s018.pdf]

**Table S4. Validation results of *de novo* assemblies.**

| Contig ID | 5' primer             | 3' primer            | Alignment |
|-----------|-----------------------|----------------------|-----------|
| NODE_162  | tgggtcaatgcacatac     | gccgaatcttgtggatt    | +         |
| NODE_201  | tatcccagcaagccttt     | ccgagtaaggttaccaac   | +         |
| NODE_492  | tagagtcattcaacctcc    | agctattaaagagagg     |           |
| NODE_681  | gacatgctggctacattgt   | tccttcacacactcaag    | +         |
| NODE_727  | aaccatgggcatcatac     | aatttggtgcctgctg     | +         |
| NODE_736  | tttcttgggccgtgcct     | gattgttctcgcaaga     | +         |
| NODE_956  | cagatgagccgtgttat     | tgggagctgcagtatt     | +         |
| NODE_1127 | gcttacactccccatgt     | ctggagaaaacacattatg  | +         |
| NODE_1660 | atgtcgggtatttgtttg    | agatacaagtcggtacag   | +         |
| NODE_3333 | agaaggtccaagtttgc     | atgggtgtaatttactc    |           |
| NODE_4353 | gatagattgtgaagtgtaaac | ttggtagactggaaagg    | +         |
| NODE_7043 | acaacgtgctgcaggttcat  | ggtggatcattgaatcccct | +         |

+ means validated contigs; blank means contigs not amplified with these primers.
