# Supplementary material for: Genome-Wide DNA Polymorphisms in Seven Rice Cultivars of Temperate and Tropical Japonica Groups
Source: PLoS One. 2014 Jan 21;9(1):e86312. doi: 10.1371/journal.pone.0086312 (PMC3897683; doi:10.1371/journal.pone.0086312)
Supplement: Table S6 — Newly covered genes by contigs in the Nipponbare genome. (XLSX) [file pone.0086312.s020.xlsx]

## Sheet: Omachi
Table S6. Newly covered genes by contigs in the Nipponbare genome.
Omachi
ID	Description	GO	InterPro
Os01t0113400-01	Similar to Receptor-like kinase.	Protein kinase, catalytic domain (IPR000719), Serine-threonine/tyrosine-protein kinase (IPR001245), Serine/threonine-protein kinase, catalytic domain (IPR002290), Serine/threonine-protein kinase, active site (IPR008271), Protein kinase-like domain (IPR011009), Protein kinase, ATP binding site (IPR017441), Tyrosine-protein kinase, catalytic domain (IPR020635)	Biological Process: protein phosphorylation (GO:0006468), Molecular Function: protein kinase activity (GO:0004672), Molecular Function: protein serine/threonine kinase activity (GO:0004674), Molecular Function: protein tyrosine kinase activity (GO:0004713), Molecular Function: ATP binding (GO:0005524), Molecular Function: transferase activity, transferring phosphorus-containing groups (GO:0016772)
Os01t0113500-01	Similar to Receptor-like kinase.	Protein kinase, catalytic domain (IPR000719), Serine/threonine-protein kinase, active site (IPR008271), Protein kinase-like domain (IPR011009), Concanavalin A-like lectin/glucanase, subgroup (IPR013320), Protein kinase, ATP binding site (IPR017441), Serine/threonine-protein kinase-like domain (IPR017442)	Biological Process: protein phosphorylation (GO:0006468), Molecular Function: protein kinase activity (GO:0004672), Molecular Function: protein serine/threonine kinase activity (GO:0004674), Molecular Function: ATP binding (GO:0005524), Molecular Function: transferase activity, transferring phosphorus-containing groups (GO:0016772)
Os01t0145200-01	Protein of unknown function DUF3681 domain containing protein.	Protein of unknown function DUF3681 (IPR022149)
Os01t0151400-01	Similar to Gamma-glutamyl transferase.	Gamma-glutamyltranspeptidase (IPR000101)	Molecular Function: gamma-glutamyltransferase activity (GO:0003840)
Os01t0161000-00	Hypothetical conserved gene.	Leucine-rich repeat (IPR001611), Leucine-rich repeat, typical subtype (IPR003591), Leucine-rich repeat-containing N-terminal, type 2 (IPR013210)	Molecular Function: protein binding (GO:0005515)
Os02t0614966-00	Leucine-rich repeat domain containing protein.	Leucine-rich repeat (IPR001611), Leucine-rich repeat-containing N-terminal, type 2 (IPR013210)	Molecular Function: protein binding (GO:0005515)
Os04t0163700-01	Conserved hypothetical protein.
Os04t0367000-01	Hypothetical conserved gene.
Os04t0369100-00	Similar to H0607F01.9 protein.	Mannose-binding lectin (IPR001229)
Os04t0370100-01	Similar to OSIGBa0107E14.7 protein.	EGF-type aspartate/asparagine hydroxylation site (IPR000152), Protein kinase, catalytic domain (IPR000719), EGF-like calcium-binding (IPR001881), Serine/threonine-protein kinase, catalytic domain (IPR002290), Epidermal growth factor-like (IPR006210), Serine/threonine-protein kinase, active site (IPR008271), Protein kinase-like domain (IPR011009), Serine/threonine-protein kinase-like domain (IPR01…	Biological Process: protein phosphorylation (GO:0006468), Molecular Function: protein kinase activity (GO:0004672), Molecular Function: protein serine/threonine kinase activity (GO:0004674), Molecular Function: protein tyrosine kinase activity (GO:0004713), Molecular Function: calcium ion binding (GO:0005509), Molecular Function: protein binding (GO:0005515), Molecular Function: ATP binding (GO:0…
Os06t0514700-01	Hypothetical conserved gene.
Os06t0581300-01	Hypothetical conserved gene.	Protein of unknown function DUF1475 (IPR009943)
Os06t0581300-02	Protein of unknown function DUF1475 family protein.	Protein of unknown function DUF1475 (IPR009943)
Os06t0581500-01	Protein kinase, core domain containing protein.	Protein kinase, catalytic domain (IPR000719), Leucine-rich repeat (IPR001611), Serine/threonine-protein kinase, active site (IPR008271), Protein kinase-like domain (IPR011009), Leucine-rich repeat-containing N-terminal, type 2 (IPR013210), Protein kinase, ATP binding site (IPR017441), Serine/threonine-protein kinase-like domain (IPR017442)	Biological Process: protein phosphorylation (GO:0006468), Molecular Function: protein kinase activity (GO:0004672), Molecular Function: protein serine/threonine kinase activity (GO:0004674), Molecular Function: protein binding (GO:0005515), Molecular Function: ATP binding (GO:0005524), Molecular Function: transferase activity, transferring phosphorus-containing groups (GO:0016772)
Os06t0586150-00	Protein kinase, catalytic domain domain containing protein.	Protein kinase, catalytic domain (IPR000719), Leucine-rich repeat (IPR001611), Serine/threonine-protein kinase, active site (IPR008271), Protein kinase-like domain (IPR011009), Leucine-rich repeat-containing N-terminal, type 2 (IPR013210), Protein kinase, ATP binding site (IPR017441), Serine/threonine-protein kinase-like domain (IPR017442)	Biological Process: protein phosphorylation (GO:0006468), Molecular Function: protein kinase activity (GO:0004672), Molecular Function: protein serine/threonine kinase activity (GO:0004674), Molecular Function: protein binding (GO:0005515), Molecular Function: ATP binding (GO:0005524), Molecular Function: transferase activity, transferring phosphorus-containing groups (GO:0016772)
Os06t0586900-01	Similar to Elicitor-inducible LRR receptor-like protein EILP.
Os06t0586900-02	Similar to Elicitor-inducible LRR receptor-like protein EILP.
Os06t0587000-00	Leucine-rich repeat domain containing protein.	Leucine-rich repeat (IPR001611), Leucine-rich repeat, typical subtype (IPR003591), Leucine-rich repeat-containing N-terminal, type 2 (IPR013210)	Molecular Function: protein binding (GO:0005515)
Os06t0587300-01	Hypothetical protein.
Os06t0596200-00	Conserved hypothetical protein.
Os07t0535100-01	Cyclin-like F-box domain containing protein.	F-box domain, cyclin-like (IPR001810), F-box associated interaction domain (IPR017451), F-box domain, Skp2-like (IPR022364)	Molecular Function: protein binding (GO:0005515)
Os11t0189600-01	Similar to Cycloartenol synthase.	Prenyltransferase/squalene oxidase (IPR001330), Terpene synthase, conserved site (IPR002365), Terpenoid cylases/protein prenyltransferase alpha-alpha toroid (IPR008930), Squalene cyclase (IPR018333)	Molecular Function: catalytic activity (GO:0003824), Molecular Function: intramolecular transferase activity (GO:0016866)
Os11t0189600-02	Similar to cDNA clone:J013062J12, full insert sequence.	Prenyltransferase/squalene oxidase (IPR001330), Terpene synthase, conserved site (IPR002365), Terpenoid cylases/protein prenyltransferase alpha-alpha toroid (IPR008930), Squalene cyclase (IPR018333)	Molecular Function: catalytic activity (GO:0003824), Molecular Function: intramolecular transferase activity (GO:0016866)
Os11t0559533-01	Hypothetical gene.
Os11t0673600-00	Similar to NB-ARC domain containing protein, expressed.	Leucine-rich repeat (IPR001611)	Molecular Function: protein binding (GO:0005515)
Os11t0693800-01	Similar to ATP-citrate synthase.	ATP-grasp fold, succinyl-CoA synthetase-type (IPR013650), ATP-grasp fold, subdomain 2 (IPR013816)	Molecular Function: ATP binding (GO:0005524), Molecular Function: ligase activity (GO:0016874)
Os11t0695900-01	Armadillo-like helical domain containing protein.	Armadillo-like helical (IPR011989), Armadillo-type fold (IPR016024)	Molecular Function: binding (GO:0005488)
Os12t0632100-01	Similar to ARL2 G-protein.

## Sheet: Yamadanishiki
Table S6. Newly covered genes by contigs in the Nipponbare genome.
Yamadanishiki
ID	Description	GO	InterPro
Os01t0151500-00	Similar to GGT4 (GAMMA-GLUTAMYL TRANSPEPTIDASE 4); gamma-glutamyltransferase/ glutathione gamma-glutamylcysteinyltransferase.	Gamma-glutamyltranspeptidase (IPR000101)	Molecular Function: gamma-glutamyltransferase activity (GO:0003840)
Os02t0227900-00	Leucine-rich repeat domain containing protein.	Leucine-rich repeat (IPR001611)	Molecular Function: protein binding (GO:0005515)
Os04t0367000-01	Hypothetical conserved gene.
Os06t0514700-01	Hypothetical conserved gene.
Os06t0581500-01	Protein kinase, core domain containing protein.	Protein kinase, catalytic domain (IPR000719), Leucine-rich repeat (IPR001611), Serine/threonine-protein kinase, active site (IPR008271), Protein kinase-like domain (IPR011009), Leucine-rich repeat-containing N-terminal, type 2 (IPR013210), Protein kinase, ATP binding site (IPR017441), Serine/threonine-protein kinase-like domain (IPR017442)	Biological Process: protein phosphorylation (GO:0006468), Molecular Function: protein kinase activity (GO:0004672), Molecular Function: protein serine/threonine kinase activity (GO:0004674), Molecular Function: protein binding (GO:0005515), Molecular Function: ATP binding (GO:0005524), Molecular Function: transferase activity, transferring phosphorus-containing groups (GO:0016772)
Os11t0229500-01	Similar to NBS-LRR protein (Fragment).	Disease resistance protein (IPR000767), NB-ARC (IPR002182)	Biological Process: defense response (GO:0006952), Molecular Function: ADP binding (GO:0043531)
Os11t0229600-01	Hypothetical gene.
Os11t0229600-02	Hypothetical protein.
Os11t0676050-00	Similar to NB-ARC domain containing protein.

## Sheet: Kameji
Table S6. Newly covered genes by contigs in the Nipponbare genome.
Kameji
ID	Description	GO	InterPro
Os02t0614966-00	Leucine-rich repeat domain containing protein.	Leucine-rich repeat (IPR001611), Leucine-rich repeat-containing N-terminal, type 2 (IPR013210)	Molecular Function: protein binding (GO:0005515)
Os04t0370100-01	Similar to OSIGBa0107E14.7 protein.	EGF-type aspartate/asparagine hydroxylation site (IPR000152), Protein kinase, catalytic domain (IPR000719), EGF-like calcium-binding (IPR001881), Serine/threonine-protein kinase, catalytic domain (IPR002290), Epidermal growth factor-like (IPR006210), Serine/threonine-protein kinase, active site (IPR008271), Protein kinase-like domain (IPR011009), Serine/threonine-protein kinase-like domain (IPR01…	Biological Process: protein phosphorylation (GO:0006468), Molecular Function: protein kinase activity (GO:0004672), Molecular Function: protein serine/threonine kinase activity (GO:0004674), Molecular Function: protein tyrosine kinase activity (GO:0004713), Molecular Function: calcium ion binding (GO:0005509), Molecular Function: protein binding (GO:0005515), Molecular Function: ATP binding (GO:0…
Os11t0694100-01	Similar to Protein kinase domain containing protein, expressed.	EGF-type aspartate/asparagine hydroxylation site (IPR000152), Protein kinase, catalytic domain (IPR000719), Epidermal growth factor-like, type 3 (IPR000742), Serine-threonine/tyrosine-protein kinase (IPR001245), EGF-like calcium-binding (IPR001881), Epidermal growth factor-like (IPR006210), Serine/threonine-protein kinase, active site (IPR008271), Protein kinase-like domain (IPR011009), Protein k…	Biological Process: protein phosphorylation (GO:0006468), Molecular Function: protein kinase activity (GO:0004672), Molecular Function: protein serine/threonine kinase activity (GO:0004674), Molecular Function: calcium ion binding (GO:0005509), Molecular Function: protein binding (GO:0005515), Molecular Function: ATP binding (GO:0005524), Molecular Function: transferase activity, transferring pho…
Os11t0695800-01	Similar to Receptor kinase MRKc.	Leucine-rich repeat (IPR001611), Leucine-rich repeat, typical subtype (IPR003591), Leucine-rich repeat-containing N-terminal, type 2 (IPR013210)	Molecular Function: protein binding (GO:0005515)

## Sheet: Gohyakumangoku
Table S6. Newly covered genes by contigs in the Nipponbare genome.
Gohyakumangoku
ID	Description	GO	InterPro
Os04t0139100-00	Similar to H0820C10.1 protein.	Protein of unknown function DUF594 (IPR007658)
Os11t0625802-01	Non-protein coding transcript.
Os11t0625900-01	Protein kinase, core domain containing protein.	Protein kinase, catalytic domain (IPR000719), Leucine-rich repeat (IPR001611), Serine/threonine-protein kinase, active site (IPR008271), Protein kinase-like domain (IPR011009), Leucine-rich repeat-containing N-terminal, type 2 (IPR013210), Concanavalin A-like lectin/glucanase, subgroup (IPR013320), Protein kinase, ATP binding site (IPR017441), Serine/threonine-protein kinase-like domain (IPR01744…	Biological Process: protein phosphorylation (GO:0006468), Molecular Function: protein kinase activity (GO:0004672), Molecular Function: protein serine/threonine kinase activity (GO:0004674), Molecular Function: protein binding (GO:0005515), Molecular Function: ATP binding (GO:0005524), Molecular Function: transferase activity, transferring phosphorus-containing groups (GO:0016772)
Os11t0694100-01	Similar to Protein kinase domain containing protein, expressed.	EGF-type aspartate/asparagine hydroxylation site (IPR000152), Protein kinase, catalytic domain (IPR000719), Epidermal growth factor-like, type 3 (IPR000742), Serine-threonine/tyrosine-protein kinase (IPR001245), EGF-like calcium-binding (IPR001881), Epidermal growth factor-like (IPR006210), Serine/threonine-protein kinase, active site (IPR008271), Protein kinase-like domain (IPR011009), Protein k…	Biological Process: protein phosphorylation (GO:0006468), Molecular Function: protein kinase activity (GO:0004672), Molecular Function: protein serine/threonine kinase activity (GO:0004674), Molecular Function: calcium ion binding (GO:0005509), Molecular Function: protein binding (GO:0005515), Molecular Function: ATP binding (GO:0005524), Molecular Function: transferase activity, transferring pho…
Os11t0694125-00	Hypothetical protein.
Os11t0695800-01	Similar to Receptor kinase MRKc.	Leucine-rich repeat (IPR001611), Leucine-rich repeat, typical subtype (IPR003591), Leucine-rich repeat-containing N-terminal, type 2 (IPR013210)	Molecular Function: protein binding (GO:0005515)
Os12t0211500-01	Leucine-rich repeat, N-terminal domain containing protein.	Leucine-rich repeat (IPR001611), Leucine-rich repeat-containing N-terminal, type 2 (IPR013210)	Molecular Function: protein binding (GO:0005515)

## Sheet: Koshihikari
Table S6. Newly covered genes by contigs in the Nipponbare genome.
Koshihikari
ID	Description	GO	InterPro
Os01t0146200-01	Protein of unknown function DUF3681 domain containing protein.	Protein of unknown function DUF3681 (IPR022149)
Os01t0162300-01	Leucine-rich repeat, plant specific containing protein.	Leucine-rich repeat (IPR001611)	Molecular Function: protein binding (GO:0005515)
Os11t0625802-01	Non-protein coding transcript.
Os11t0625900-01	Protein kinase, core domain containing protein.	Protein kinase, catalytic domain (IPR000719), Leucine-rich repeat (IPR001611), Serine/threonine-protein kinase, active site (IPR008271), Protein kinase-like domain (IPR011009), Leucine-rich repeat-containing N-terminal, type 2 (IPR013210), Concanavalin A-like lectin/glucanase, subgroup (IPR013320), Protein kinase, ATP binding site (IPR017441), Serine/threonine-protein kinase-like domain (IPR01744…	Biological Process: protein phosphorylation (GO:0006468), Molecular Function: protein kinase activity (GO:0004672), Molecular Function: protein serine/threonine kinase activity (GO:0004674), Molecular Function: protein binding (GO:0005515), Molecular Function: ATP binding (GO:0005524), Molecular Function: transferase activity, transferring phosphorus-containing groups (GO:0016772)
Os11t0673600-00	Similar to NB-ARC domain containing protein, expressed.	Leucine-rich repeat (IPR001611)	Molecular Function: protein binding (GO:0005515)

## Sheet: Norin 8
Table S6. Newly covered genes by contigs in the Nipponbare genome.
Norin 8
ID	Description	GO	InterPro
Os04t0136900-01	Similar to OSIGBa0147B06.6 protein.
Os12t0211500-01	Leucine-rich repeat, N-terminal domain containing protein.	Leucine-rich repeat (IPR001611), Leucine-rich repeat-containing N-terminal, type 2 (IPR013210)	Molecular Function: protein binding (GO:0005515)

## Sheet: Moroberekan
Table S6. Newly covered genes by contigs in the Nipponbare genome.
Moroberekan
ID	Description	GO	InterPro
Os01t0144600-01	Conserved hypothetical protein.
Os01t0161000-00	Hypothetical conserved gene.	Leucine-rich repeat (IPR001611), Leucine-rich repeat, typical subtype (IPR003591), Leucine-rich repeat-containing N-terminal, type 2 (IPR013210)	Molecular Function: protein binding (GO:0005515)
Os01t0162300-01	Leucine-rich repeat, plant specific containing protein.	Leucine-rich repeat (IPR001611)	Molecular Function: protein binding (GO:0005515)
Os01t0579600-01	Similar to Calcineurin B-like protein 9.	EF-hand-like domain (IPR011992), EF-HAND 2 (IPR018249)	Molecular Function: calcium ion binding (GO:0005509)
Os01t0579600-02	Similar to Isoform 2 of Calcineurin B-like protein 9.
Os01t0601700-01	Leucine-rich repeat domain containing protein.	Leucine-rich repeat (IPR001611), Leucine-rich repeat, typical subtype (IPR003591)	Molecular Function: protein binding (GO:0005515)
Os02t0227700-01	Serine/threonine protein kinase-related domain containing protein.	Protein kinase, catalytic domain (IPR000719), Leucine-rich repeat (IPR001611), Serine/threonine-protein kinase, active site (IPR008271), Protein kinase-like domain (IPR011009), Leucine-rich repeat-containing N-terminal, type 2 (IPR013210), Serine/threonine-protein kinase-like domain (IPR017442)	Biological Process: protein phosphorylation (GO:0006468), Molecular Function: protein kinase activity (GO:0004672), Molecular Function: protein serine/threonine kinase activity (GO:0004674), Molecular Function: protein binding (GO:0005515), Molecular Function: ATP binding (GO:0005524), Molecular Function: transferase activity, transferring phosphorus-containing groups (GO:0016772)
Os02t0227900-00	Leucine-rich repeat domain containing protein.	Leucine-rich repeat (IPR001611)	Molecular Function: protein binding (GO:0005515)
Os02t0598500-00	Protein phosphatase 2C family protein.	Protein phosphatase 2C, manganese/magnesium aspartate binding site (IPR000222), Protein phosphatase 2C-like (IPR001932), Protein phosphatase 2C (IPR015655)	Biological Process: protein dephosphorylation (GO:0006470), Cellular Component: protein serine/threonine phosphatase complex (GO:0008287), Molecular Function: catalytic activity (GO:0003824), Molecular Function: protein serine/threonine phosphatase activity (GO:0004722)
Os03t0368300-01	Similar to Peroxidase 1.	Plant peroxidase (IPR000823), Haem peroxidase, plant/fungal/bacterial (IPR002016), Haem peroxidase (IPR010255), Peroxidases heam-ligand binding site (IPR019793), Peroxidase, active site (IPR019794)	Biological Process: response to oxidative stress (GO:0006979), Biological Process: oxidation-reduction process (GO:0055114), Molecular Function: peroxidase activity (GO:0004601), Molecular Function: heme binding (GO:0020037)
Os03t0402400-00	Similar to Ribosome-associated protein p40-like.	Ribosomal protein S2 (IPR001865), Ribosomal protein S2, eukaryotic/archaeal (IPR005707), Ribosomal protein S2, conserved site (IPR018130), Ribosomal protein S2, flavodoxin-like domain (IPR023591)	Biological Process: translation (GO:0006412), Cellular Component: intracellular (GO:0005622), Cellular Component: ribosome (GO:0005840), Cellular Component: small ribosomal subunit (GO:0015935), Molecular Function: structural constituent of ribosome (GO:0003735)
Os03t0841100-01	Serine/threonine protein kinase-related domain containing protein.	Protein kinase, catalytic domain (IPR000719), Epidermal growth factor-like (IPR006210), Serine/threonine-protein kinase, active site (IPR008271), Protein kinase-like domain (IPR011009), Concanavalin A-like lectin/glucanase, subgroup (IPR013320), Protein kinase, ATP binding site (IPR017441), Serine/threonine-protein kinase-like domain (IPR017442), EGF-like calcium-binding, conserved site (IPR01809…	Biological Process: protein phosphorylation (GO:0006468), Molecular Function: protein kinase activity (GO:0004672), Molecular Function: protein serine/threonine kinase activity (GO:0004674), Molecular Function: calcium ion binding (GO:0005509), Molecular Function: protein binding (GO:0005515), Molecular Function: ATP binding (GO:0005524), Molecular Function: transferase activity, transferring pho…
Os04t0111225-00	Similar to H0215A08.5 protein.	PUA-like domain (IPR015947)
Os04t0116600-01	Glucose/ribitol dehydrogenase family protein.	Short-chain dehydrogenase/reductase SDR (IPR002198), Glucose/ribitol dehydrogenase (IPR002347), NAD(P)-binding domain (IPR016040)	Biological Process: metabolic process (GO:0008152), Molecular Function: nucleotide binding (GO:0000166), Molecular Function: oxidoreductase activity (GO:0016491)
Os04t0116650-00	Hypothetical protein.
Os04t0122200-00	Similar to OSIGBa0137A06.2 protein.	Protein kinase, catalytic domain (IPR000719), Leucine-rich repeat (IPR001611), Serine/threonine-protein kinase, catalytic domain (IPR002290), Leucine-rich repeat, typical subtype (IPR003591), Serine/threonine-protein kinase, active site (IPR008271), Protein kinase-like domain (IPR011009), Leucine-rich repeat-containing N-terminal, type 2 (IPR013210), Protein kinase, ATP binding site (IPR017441), …	Biological Process: protein phosphorylation (GO:0006468), Molecular Function: protein kinase activity (GO:0004672), Molecular Function: protein serine/threonine kinase activity (GO:0004674), Molecular Function: protein tyrosine kinase activity (GO:0004713), Molecular Function: protein binding (GO:0005515), Molecular Function: ATP binding (GO:0005524), Molecular Function: transferase activity, tra…
Os04t0126600-00	Similar to OSIGBa0115D20.4 protein.	Peptidase S8/S53, subtilisin/kexin/sedolisin (IPR000209), Peptidase S8, subtilisin-related (IPR015500)	Biological Process: proteolysis (GO:0006508), Molecular Function: serine-type endopeptidase activity (GO:0004252)
Os04t0147200-01	Protein of unknown function DUF594 domain containing protein.	Protein of unknown function DUF594 (IPR007658)
Os04t0170866-00	Conserved hypothetical protein.
Os04t0508150-01	Hypothetical gene.
Os05t0365700-01	Glycoside hydrolase, family 1 protein.	Glycoside hydrolase, family 1 (IPR001360), Glycoside hydrolase, subgroup, catalytic domain (IPR013781), Glycoside hydrolase, superfamily (IPR017853), Glycoside hydrolase, family 1, active site (IPR018120)	Biological Process: carbohydrate metabolic process (GO:0005975), Molecular Function: catalytic activity (GO:0003824), Molecular Function: hydrolase activity, hydrolyzing O-glycosyl compounds (GO:0004553), Molecular Function: cation binding (GO:0043169)
Os05t0550700-00	Protein kinase, catalytic domain domain containing protein.	Protein kinase, catalytic domain (IPR000719), Serine-threonine/tyrosine-protein kinase (IPR001245), Serine/threonine-protein kinase, catalytic domain (IPR002290), Serine/threonine-protein kinase, active site (IPR008271), Protein kinase-like domain (IPR011009), Protein kinase, ATP binding site (IPR017441), Tyrosine-protein kinase, catalytic domain (IPR020635)	Biological Process: protein phosphorylation (GO:0006468), Molecular Function: protein kinase activity (GO:0004672), Molecular Function: protein serine/threonine kinase activity (GO:0004674), Molecular Function: protein tyrosine kinase activity (GO:0004713), Molecular Function: ATP binding (GO:0005524), Molecular Function: transferase activity, transferring phosphorus-containing groups (GO:0016772)
Os06t0186400-01	Similar to Serine carboxypeptidase II-2 precursor (EC 3.4.16.6) (CP-MII.2) (Fragment).	Peptidase S10, serine carboxypeptidase (IPR001563), Peptidase S10, serine carboxypeptidase, active site (IPR018202)	Biological Process: proteolysis (GO:0006508), Molecular Function: serine-type carboxypeptidase activity (GO:0004185)
Os06t0252800-01	Similar to STF-1 (Fragment).	Sulfotransferase domain (IPR000863)	Molecular Function: sulfotransferase activity (GO:0008146)
Os06t0254300-01	Similar to EF-hand calcium bining protein.	Caleosin (IPR007736), EF-hand-like domain (IPR011992), EF-HAND 2 (IPR018249)	Molecular Function: calcium ion binding (GO:0005509)
Os06t0254300-02	Caleosin related family protein.	Caleosin (IPR007736)
Os06t0254300-03	Similar to EF-hand calcium bining protein.	Caleosin (IPR007736), EF-hand-like domain (IPR011992), EF-HAND 2 (IPR018249)	Molecular Function: calcium ion binding (GO:0005509)
Os06t0565000-00	Hypothetical conserved gene.	Pentatricopeptide repeat (IPR002885), Tetratricopeptide-like helical (IPR011990)	Molecular Function: binding (GO:0005488)
Os06t0565100-00	Cytochrome P450 family protein.	Cytochrome P450 (IPR001128), Cytochrome P450, E-class, group I (IPR002401), Cytochrome P450, conserved site (IPR017972)	Biological Process: oxidation-reduction process (GO:0055114), Molecular Function: iron ion binding (GO:0005506), Molecular Function: electron carrier activity (GO:0009055), Molecular Function: oxidoreductase activity, acting on paired donors, with incorporation or reduction of molecular oxygen (GO:0016705), Molecular Function: heme binding (GO:0020037)
Os07t0541500-01	Similar to KI domain interacting kinase 1.	Protein kinase, catalytic domain (IPR000719), Gnk2-homologous domain (IPR002902), Serine/threonine-protein kinase, active site (IPR008271), Protein kinase-like domain (IPR011009), Protein kinase, ATP binding site (IPR017441), Serine/threonine-protein kinase-like domain (IPR017442)	Biological Process: protein phosphorylation (GO:0006468), Molecular Function: protein kinase activity (GO:0004672), Molecular Function: protein serine/threonine kinase activity (GO:0004674), Molecular Function: ATP binding (GO:0005524), Molecular Function: transferase activity, transferring phosphorus-containing groups (GO:0016772)
Os08t0135900-01	Similar to Tryptophan synthase beta chain 1 (EC 4.2.1.20) (Orange pericarp 1) (Fragment).	Pyridoxal phosphate-dependent enzyme, beta subunit (IPR001926), Tryptophan synthase, beta chain, conserved site (IPR006653), Tryptophan synthase, beta chain (IPR006654), Tryptophan synthase beta chain/beta chain-like (IPR023026)	Biological Process: tryptophan metabolic process (GO:0006568), Biological Process: metabolic process (GO:0008152), Molecular Function: catalytic activity (GO:0003824), Molecular Function: tryptophan synthase activity (GO:0004834), Molecular Function: pyridoxal phosphate binding (GO:0030170)
Os08t0135900-02	Similar to Tryptophan synthase beta-subunit.	Pyridoxal phosphate-dependent enzyme, beta subunit (IPR001926), Tryptophan synthase, beta chain, conserved site (IPR006653), Tryptophan synthase, beta chain (IPR006654), Tryptophan synthase beta chain/beta chain-like (IPR023026)	Biological Process: tryptophan metabolic process (GO:0006568), Biological Process: metabolic process (GO:0008152), Molecular Function: catalytic activity (GO:0003824), Molecular Function: tryptophan synthase activity (GO:0004834), Molecular Function: pyridoxal phosphate binding (GO:0030170)
Os08t0135900-03	Similar to Tryptophan synthase beta-subunit.	Pyridoxal phosphate-dependent enzyme, beta subunit (IPR001926), Tryptophan synthase, beta chain (IPR006654)	Biological Process: tryptophan metabolic process (GO:0006568), Biological Process: metabolic process (GO:0008152), Molecular Function: catalytic activity (GO:0003824), Molecular Function: tryptophan synthase activity (GO:0004834), Molecular Function: pyridoxal phosphate binding (GO:0030170)
Os08t0136001-00	Hypothetical gene.
Os08t0249750-01	Non-protein coding transcript.
Os08t0254500-01	Similar to Preprotein translocase secY subunit, chloroplast precursor (CpSecY).	SecY protein (IPR002208), SecY subunit domain (IPR023201)	Biological Process: protein transport (GO:0015031), Cellular Component: membrane (GO:0016020), Molecular Function: P-P-bond-hydrolysis-driven protein transmembrane transporter activity (GO:0015450)
Os08t0254500-02	Similar to Preprotein translocase secY subunit, chloroplast precursor (CpSecY).	SecY protein (IPR002208), SecY subunit domain (IPR023201)	Biological Process: protein transport (GO:0015031), Cellular Component: membrane (GO:0016020), Molecular Function: P-P-bond-hydrolysis-driven protein transmembrane transporter activity (GO:0015450)
Os09t0331600-00	Ankyrin repeat domain containing protein.	Ankyrin repeat (IPR002110), Ankyrin repeat-containing domain (IPR020683)	Molecular Function: protein binding (GO:0005515)
Os09t0385300-01	Hypothetical protein.
Os09t0385300-02	Hypothetical protein.
Os10t0111400-00	Similar to Protein kinase domain containing protein, expressed.	EGF-type aspartate/asparagine hydroxylation site (IPR000152), Protein kinase, catalytic domain (IPR000719), Epidermal growth factor-like, type 3 (IPR000742), EGF-like calcium-binding (IPR001881), Serine/threonine-protein kinase, active site (IPR008271), Protein kinase-like domain (IPR011009), Protein kinase, ATP binding site (IPR017441), Serine/threonine-protein kinase-like domain (IPR017442), EG…	Biological Process: protein phosphorylation (GO:0006468), Molecular Function: protein kinase activity (GO:0004672), Molecular Function: protein serine/threonine kinase activity (GO:0004674), Molecular Function: calcium ion binding (GO:0005509), Molecular Function: protein binding (GO:0005515), Molecular Function: ATP binding (GO:0005524), Molecular Function: transferase activity, transferring pho…
Os10t0111550-00	Non-protein coding transcript.
Os10t0151500-00	Similar to Protein kinase domain containing protein, expressed.	EGF-type aspartate/asparagine hydroxylation site (IPR000152), Protein kinase, catalytic domain (IPR000719), EGF-like calcium-binding (IPR001881), Serine/threonine-protein kinase, catalytic domain (IPR002290), Epidermal growth factor-like (IPR006210), Serine/threonine-protein kinase, active site (IPR008271), Protein kinase-like domain (IPR011009), Protein kinase, ATP binding site (IPR017441), Seri…	Biological Process: protein phosphorylation (GO:0006468), Molecular Function: protein kinase activity (GO:0004672), Molecular Function: protein serine/threonine kinase activity (GO:0004674), Molecular Function: protein tyrosine kinase activity (GO:0004713), Molecular Function: calcium ion binding (GO:0005509), Molecular Function: protein binding (GO:0005515), Molecular Function: ATP binding (GO:0…
Os10t0151650-00	Hypothetical protein.
Os10t0469900-01	TGF-beta receptor, type I/II extracellular region family protein.	Oligopeptide transporter (IPR000109), Major facilitator superfamily domain, general substrate transporter (IPR016196)	Biological Process: oligopeptide transport (GO:0006857), Cellular Component: membrane (GO:0016020), Molecular Function: transporter activity (GO:0005215)
Os11t0200000-01	Histone deacetylase family protein.	Histone deacetylase superfamily (IPR000286), Histone deacetylase (IPR003084), Histone deacetylase domain (IPR023801)	Biological Process: histone deacetylation (GO:0016575), Molecular Function: histone deacetylase activity (GO:0004407)
Os11t0200600-01	Cyclin-like F-box domain containing protein.	F-box domain, cyclin-like (IPR001810), F-box domain, Skp2-like (IPR022364)	Molecular Function: protein binding (GO:0005515)
Os11t0201441-00	Hypothetical protein.
Os11t0227100-00	Similar to NBS-LRR-like protein.	NB-ARC (IPR002182)	Molecular Function: ADP binding (GO:0043531)
Os11t0432400-01	Similar to 2-oxoglutarate/malate translocator.	Mitochondrial carrier protein (IPR002067), Mitochondrial substrate/solute carrier (IPR018108), Mitochondrial carrier domain (IPR023395)	Biological Process: transport (GO:0006810), Biological Process: transmembrane transport (GO:0055085), Cellular Component: mitochondrial inner membrane (GO:0005743), Molecular Function: binding (GO:0005488)
Os11t0539600-00	Conserved hypothetical protein.
Os11t0540800-00	Protein of unknown function DUF247, plant domain containing protein.	Protein of unknown function DUF247, plant (IPR004158)
Os11t0606400-02	Similar to NB-ARC domain containing protein, expressed.
Os11t0625802-01	Non-protein coding transcript.
Os11t0625900-01	Protein kinase, core domain containing protein.	Protein kinase, catalytic domain (IPR000719), Leucine-rich repeat (IPR001611), Serine/threonine-protein kinase, active site (IPR008271), Protein kinase-like domain (IPR011009), Leucine-rich repeat-containing N-terminal, type 2 (IPR013210), Concanavalin A-like lectin/glucanase, subgroup (IPR013320), Protein kinase, ATP binding site (IPR017441), Serine/threonine-protein kinase-like domain (IPR01744…	Biological Process: protein phosphorylation (GO:0006468), Molecular Function: protein kinase activity (GO:0004672), Molecular Function: protein serine/threonine kinase activity (GO:0004674), Molecular Function: protein binding (GO:0005515), Molecular Function: ATP binding (GO:0005524), Molecular Function: transferase activity, transferring phosphorus-containing groups (GO:0016772)
Os11t0645886-00	NB-ARC domain containing protein.	NB-ARC (IPR002182)	Molecular Function: ADP binding (GO:0043531)
Os11t0645972-00	Non-protein coding transcript.
Os11t0649300-01	Hypothetical conserved gene.	Protein of unknown function DUF3615 (IPR022059)
Os11t0673600-00	Similar to NB-ARC domain containing protein, expressed.	Leucine-rich repeat (IPR001611)	Molecular Function: protein binding (GO:0005515)
Os11t0675200-00	Similar to NB-ARC domain containing protein, expressed.
Os11t0676050-00	Similar to NB-ARC domain containing protein.
Os11t0677000-00	Similar to NB-ARC domain containing protein, expressed.	Leucine-rich repeat (IPR001611), Leucine-rich repeat, typical subtype (IPR003591)	Molecular Function: protein binding (GO:0005515)
Os11t0677050-01	Non-protein coding transcript.
Os12t0481700-00	Disease resistance protein domain containing protein.	Disease resistance protein (IPR000767), NB-ARC (IPR002182)	Biological Process: defense response (GO:0006952), Molecular Function: ADP binding (GO:0043531)
